# Supplementary material for: Rdh54/Tid1 inhibits Rad51-Rad54-mediated D-loop formation and limits D-loop length
Source: eLife. 2020 Nov 13;9:e59112. doi: 10.7554/eLife.59112 (PMC7695457; doi:10.7554/eLife.59112)
Supplement: Source data 1. [file elife-59112-data1.xlsx]

## Sheet: Figure 1
	Data for Figure-Supplement-1D:
	ds98-607					ds98-607-78ss
	0x	1x	3x	7x	14x	0x	1x	3x	7x	14x
	25.9973	20.1671	12.3346	11.0787	9.08583	36.9051	35.796	33.9869	24.9039	21.079
	21.42	15.5626	10.16	8.2	6.1	41.0766	37.923	28.324	22.7686	22.7676
	32.6765	26.5741	26.0028	24.1294	7.25	56.498	43.3175	47.0518	33.7197	16.55
	Data for Figure-1C (normalized from Figure-Supplement-1D):
	ds98-607					ds98-607-78ss
	0x	1x	3x	7x	14x	0x	1x	3x	7x	14x
	100	77.5739	47.4458	42.6147	34.9491	100	96.9946	92.0926	67.481	57.1167
	100	72.6546	47.4323	38.282	28.4781	100	92.3226	68.9541	55.4296	55.4271
	100	81.3248	79.5763	73.8433	22.1872	100	76.6708	83.2804	59.683	29.2931
	Data for Figure-Supplement-1E:
	ds98-607				ds98-607-78ss
	0x	1x	3x	7x	0x	1x	3x	7x
	11	8	6.4	1.1	38.1	26.7	22.7	8.3
	22	12.15	2.7	0	47.4	37.25	23	13.7
	24.2	21.3	8.2	4.7	56.7	47.3	15	0
	Data for Figure-1E (normalized from Figure-Supplement-1E):
	ds98-607				ds98-607-78ss
	0x	1x	3x	7x	0x	1x	3x	7x
	100	72.7273	58.1818	10	100	70.0787	59.5801	21.7848
	100	55.2273	12.2727	0	100	78.5865	48.5232	28.903
	100	88.0165	33.8843	19.4215	100	83.4215	26.455	0
	Data for Figure-Supplement-1G:
	ds98-607					ds98-607-78ss
	0x	1x	3x	7x	14x	0x	1x	3x	7x	14x
	100	83.8793	68.3538	44.311	34.0846	100	86.8376	43.6103	38.6729	26.4617
	100	91.6718	82.2832	57.8001	68.6963	100	97.8638	74.4934	73.302	61.1344
	100	92.2832	77.6	48.67	38	100	99.2891	75.2386	64.5759	49.25
	Related to Figure 2C:
	Tid1 (nM)/Rad54 (nM)	7.5 nM		15 nM		30 nM
	0	1	1	1	1	1	1
	5	0.988977	1.01944	0.886163	0.938988	1.04824	1.19059
	15	0.332277	0.395175	0.934065	0.838846	0.917468	1.10876
	35	0.164781	0.315196	0.532485	0.419354	0.896656	0.845703
	60			0.258493	0.182941	0.669463	0.366356
	Related to Figure-S2B:
	Grey	Red	Green	Blue	Grey	Red	Green	Blue
	0x	7x	7x (with d+54)	7x (post d+54)	0x	7x	7x (with d+54)	7x (post d+54)
	11	1.1	5.18	12.33	38.1	8.3	18.69	41.44
	22	0	12.35	21.11	47.4	13.7	30.36	42.05
	24.2	4.7	7.1	19.4	56.7	0	40.2	62.7
	Related to Figure-2E:
	Grey	Red	Green	Blue	Grey	Red	Green	Blue
	0x	7x	7x (with d+54)	7x (post d+54)	0x	7x	7x (with d+54)	7x (post d+54)
	100	10	47.0909	112.091	100	21.7848	49.0551	108.766
	100	0	56.1364	95.9545	100	28.903	64.0506	88.7131
	100	19.4215	29.3388	80.1653	100	0	70.8995	110.582
	Related to Figure S2C, D:
	dsDNA, Rad51, Tid1-KR	Rad54, dsDNA	Tid1-KR prior to Rad54				Tid1-KR after Rad54
	i	ii	0x	1x	3x	7x	0x	7x
	35	355	4278	3350	1640	790	4278	4722
	30	429	3557	3434	1443	503	3557	4208
	23	354	4495			630	4495	3350
	Related to Figure 5B:
	Rad51: nt = 1:x	1	3	6	12	24	48
		9.44016	15.7673	16.7682	21.6947		11
		11.6737	22.2625	23.4222	22.731	4.76049	1.69474
		14.1771	40.8886	36.6219	38.7806	28.8422	22.551
	Related to Figure S4C:
	Rad51: nt = 1:x	1	3	6	12
		11.1111	15.4772	15.7745	21.8271
		10.2249	33.119	41.2639	34.0425
		15.4545	27.2152	35.3383	33.0855
	Related to Figure S5B:
	ds98-931				ds98-915-78ss
	0x	1x	3x	7x	0x	1x	3x	7x
	100	68.7964	38.478	0.930488	100	96.6669	78.7188	0.548982
	100	85.2479	72.442	17.3169	100	105.779	40.3222	24.4256
	100	85.8255	66.8971	12.6131	100	85.9216	78.005	39.0414
	Related to Figure S5E:
	ds98-931								ds98-915-78ss
	Gel				DMA				Gel				DMA
	0x	1x	3x	7x	0x	1x	3x	7x	0x	1x	3x	7x	0x	1x	3x	7x
	41.7541	39.3337	36.1796	21.6438	15.87	10.8	11.6	2.18	54.7815	55.2302	52.3062	22.5037	8.62	7.11	4.24	1.33
	34.8416	37.2739	27.0881	9.865	37.27	24.59	17	2.69	28.4098	30.0516	11.4554	6.93926	31	27.63	3.97	1.42
	41.1961	35.3567	27.559	5.19609	20	15	7	1	22.7533	19.55	17.7487	8.8832	37	16	5	1
	25.111	23.7211	19.3155		9	9	10	1	53.6619	51.5994	32.7816	5.72959	12	8	10	4
	Related to Figure 5E:
	[Tid1-KR]/[Rad54]	0-249					250-499					500-749					750-930
	0x	14.7757	11.4286	21.4286	21.2	13.4	56.4644	67.1429	51.1905	57.5	69	22.1636	21.875	25	15		5.80475	8.57143	2.38095	6
	1x	25.4658	13.5417	22.2222	30.5	20	57.764	62.5	58.5859	52.7	70	10.559	12.8571	15.1515	11		6.21118	2.08333	4.0404	5
	3x	29.0541	16.1017	27.7778	14.2	32	59.4595	66.9492	69.4444	71.4	57	10.8108	13.5593	2.77778	9		0.675676	3.38983	0	3
	7x	32	57.1429		0	33	60	42.8571		100	44	8	0		0		0	0		0
	Related to Figure S5F:
	[Tid1-KR]/[Rad54]	0-249				250-499				500-749				750-915
	0x	14.4927	17.8571	13	16	57.971	59.2857	63	68	18.8406	20.7143	20	25	8.69565	6.14286	7	5
	1x	29.8182	23.0769	31	16	52	56.4103	51	51	13.0909	17.9487	17	10	4.72727	2.5641	2	0
	3x	26.6667	26.1905	31	20	50	73.8095	58	65	9.33333	0	13	8	0	0	1	0
	7x	40	23.3333	30	40	55	66.6667	60	60	5	6.66667	3	0	0	3.33333	0	0
	Related to Figure 5G:
	ds98-931				ds98-915-78ss
	0x	1x	3x	7x	0x	1x	3x	7x
	33	31	23	19	28	27	2	14
	35	19	16	7	29	22	13	5
	33	21	7	0	25	20	16	10
	35	22	13	8	33	20	17	0
	Related to Figure S6B:
		0-249			25-499			500-749			750-930
	0x	22	26.6667	23.8366	62	56.6667	60.7843	13	14.6667	11.7647	3	2	2.96078
	1x	27.4678	36.1842		66.5236	54.1053		5.5794	9.21053		0.429185	0.5
	3x	35.8974	31.25		61.5385	64.5833		2.5641	4.16667		0	0
	7x	38.7097	43.9024		54.8387	53.6585		6.45161	2.43902		0	0
	14x	44.1861	72.7273		55.8139	27.2727		0	0		0	0
	Related to Figure S6C:
	ds98-931
	0x	1x	3x	7x	14x
	314.167	309.73	291.958	288.561	226.636
	350.36	312.06	313.641	284.935	274.023
	351.98				214.23
	Related to Figure S6D:
	ds98-931
	0x	1x	3x	7x	14x
	6.87329	3.21	1.45	1.30604	1.08
	5.86956	4.2	1.77	1.59272	1.19277

## Sheet: Figure 2
	Data for Figure-2C:
		Rad54 (nM)
	Tid1 (nM)	7.5 nM		15 nM		30 nM
	0	1	1	1	1	1	1
	5	0.988977	1.01944	0.886163	0.938988	1.04824	1.19059
	15	0.332277	0.395175	0.934065	0.838846	0.917468	1.10876
	35	0.164781	0.315196	0.532485	0.419354	0.896656	0.845703
	60	NA	NA	0.258493	0.182941	0.669463	0.366356
	Data for Figure-Supplement-2B:
	Grey	Red	Green	Blue	Grey	Red	Green	Blue
	0x	7x	7x (with d+54)	7x (post d+54)	0x	7x	7x (with d+54)	7x (post d+54)
	11	1.1	5.18	12.33	38.1	8.3	18.69	41.44
	22	0	12.35	21.11	47.4	13.7	30.36	42.05
	24.2	4.7	7.1	19.4	56.7	0	40.2	62.7
	Data for Figure-2E (normalized from Figure-Supplement-2B):
	Grey	Red	Green	Blue	Grey	Red	Green	Blue
	0x	7x	7x (with d+54)	7x (post d+54)	0x	7x	7x (with d+54)	7x (post d+54)
	100	10	47.0909	112.091	100	21.7848	49.0551	108.766
	100	0	56.1364	95.9545	100	28.903	64.0506	88.7131
	100	19.4215	29.3388	80.1653	100	0	70.8995	110.582
	Data for Figure-Supplement-2C, D:
	ATPase activity (min-1)
	dsDNA, Rad51, Tid1-KR	Rad54, dsDNA	Tid1-KR prior to Rad54				Tid1-KR after Rad54
	i	ii	0x	1x	3x	7x	0x	7x
	35	355	4278	3350	1640	790	4278	4722
	30	429	3557	3434	1443	503	3557	4208
	23	354	4495			630	4495	3350

## Sheet: Figure 3
	Data for Figure-3B:
		Normalized protein levels
		WT-a	WT-@	WT-a/@	WT-a pMAT@	WT-@ pMATa	tid1∆ MATa
		100	97.997	24.8025	18.6385	20.3317	0
		74.2781	100	24.1198	20.2565	23.1826	0
		100	103.4	22.278	18.12	21.32	0
	Data for Figure-3C:
		DLC signal (normalized to Arg value)
	WT/WT	0.2914	0.4931	0.1703	0.1978	0.202
	rdh54∆/rdh54∆	0.1548	0.3597	0.2052	0.1407	0.4889
	rdh54-KR/rdh54-KR	0.2314	0.255	0.0842	0.0945	0.2196
	Data for Figure-3D:
			2 hr post DSB: DLC (normalized to EV)
	Haploid WT	pEV	1	1
		pGST-Tid1	0.15	0.108
		pGST-tid1KR	0.278	0.105
	Diploid WT	pEV	1	1
		pGST-Tid1	0.082	0.084855
		pGST-tid1KR	0.109	0.099177
	Data for Figure-Supplement-3C
		% D-loops
		ds98-931			ds98-607			ds98-197-78ss
	DMA	15.4772	24.9127	19.181	20.7821	16.8122	18.7972	3.8526	3.3543	5.16129
	Gel	31.0209	22.1241	29.138	21.7	24.2844	16.1	2.24	4.2	5.1

## Sheet: Figure 4
	Data for Figure-4F:						Data for Figure-4G:									Data for Figure-4H:
	% D-loops						D-loop Lengths (nt)									Data were derived after merging individual replicates for each sample into one file.
	Gel	DMA					ds98-931	ds98-607	ds98-197-78ss			ds98-931	ds98-607	ds98-197-78ss			Fraction of D-loops in each bin
	13.5729	5.9		Number of XY Pairs	42		183	255	237		Number of values	181	187	24		Position bins (nt)	ds98-931	ds98-607	ds98-197-78ss
	28.1032	15.88		Pearson r	0.849		168	477	254		Minimum	115	101	116		0	0	0	0
	21.4336	11		95% confidence interval	0.7346 to 0.9165		214	410	180		25% Percentile	260.5	233	196.8		100	0	0	0
	15.603	10		P value (two-tailed)	< 0.0001		213	230	231		Median	335	299	217		200	0	0	0.00414938
	30.6876	16.2		P value summary	***		222	217	217		75% Percentile	492.5	391	241		300	0	0	0.00414938
	30.6533	37.2701		Is the correlation significant? (alpha=0.05)	Yes		315	251	214		Maximum	941	600	386		400	0	0.004	0.00414938
	28.7524	27.2152		R square	0.7208		632	278	166		Mean	397.6	315.5	222.7		500	0	0.018	0.224066
	21.1319	11.7					237	230	241		Std. Deviation	194.4	109.6	51.73		600	0	0.072	0.344398
	9.44016	11.1111					282	384	241		Std. Error	14.45	8.014	10.56		700	0.00645161	0.16	0.33195
	15.7673	15.4772					268	419	162		Lower 95% CI of mean	369.1	299.7	200.9		800	0.0365591	0.2	0.0124481
	16.7682	15.7745					214	316	245		Upper 95% CI of mean	426.2	331.4	244.6		900	0.0655914	0.202	0.00414938
	21.6947	21.8271					190	216	192		Sum	71974	59006	5345		1000	0.0978495	0.166	0.00414938
	11.6737	10.2249					258	325	211							1100	0.115054	0.12	0
	22.2625	33.119					289	238	214							1200	0.127957	0.016	0
	14.1771	15.4545					208	233	217							1300	0.132258	0	0.00414938
	40.8886	41.2639					151	239	219							1400	0.126882	0	0.00829876
	36.6219	35.3383					326	185	211							1500	0.110753	0	0.00829876
	38.7806	34.0425					318	370	239							1600	0.088172	0	0.0207469
	19.0501	17.2336					295	229	173							1700	0.0688172	0	0.0165975
	13.1058	11.7053					225	195	303							1800	0.00430108	0.002	0
	7.33008	10.8079					234	206	213							1900	0.00537634	0.01	0
	0.177259	2.76846					262	299	263							2000	0.00645161	0.014	0.00414938
	0.264879	1.337					431	363	386							2100	0.00537634	0.012	0.00414938
	24.4293	12.4475					264	298	116							2200	0.00215054	0.004	0
	20.8254	19.9623					372	382								2300	0	0	0
	4.23039	1.45867					495	214								2400	0	0	0
	28.4098	36.8098					259	191								2500	0	0	0
	30.0516	15.7143					339	234								2600	0	0	0
	11.4554	5.36723					296	281								2700	0	0	0
	6.93926	0.954654					370	196
	41.1961	37.2701					438	200								Highlighted region indicates region of homology i.e. shown in graph
	35.3567	24.595					368	207
	27.559	17.093					481	199
	5.19609	2.69151					364	241
	22.7533	28.5141					335	268
	19.55	27.6303					309	167
	17.7487	17.9747					321	214
	14.3088	20.7821					339	185
	16.1	16.8122					420	236
	5.4553	3.8526					433	188
	4.32566	3.3543					441	207
	7.1276	5.16129					586	258
							485	208
							534	284
							540	245
							607	276
							232	191
							124	423
							279	597
							281	417
							278	546
							290	448
							207	549
							242	445
							198	533
							290	517
							329	581
							124	600
							941	564
							691	443
							718	466
							641	365
							769	336
							737	439
							879	238
							888	447
							787	421
							861	304
							740	238
							758	489
							876	414
							846	468
							680	391
							738	395
							781	309
							910	392
							849	104
							260	409
							411	465
							331	340
							403	288
							461	359
							377	364
							373	372
							278	320
							320	549
							382	412
							303	333
							233	410
							130	405
							231	411
							190	359
							220	430
							236	449
							448	328
							408	371
							440	347
							509	457
							364	478
							534	345
							343	371
							401	410
							401	368
							722	380
							669	397
							440	292
							682	481
							496	388
							590	381
							679	368
							538	368
							538	328
							633	339
							724	390
							689	322
							735	415
							656	509
							790	587
							274	494
							355	537
							319	324
							351	288
							296	249
							338	207
							281	254
							279	342
							282	198
							490	208
							484	228
							521	288
							355	249
							403	342
							523	276
							438	172
							469	249
							406	299
							348	285
							477	296
							478	234
							475	154
							527	309
							289	279
							319	175
							346	307
							265	209
							238	148
							249	223
							349	323
							484	342
							613	233
							333	260
							281	217
							259	244
							303	190
							314	271
							312	213
							327	186
							322	324
							273	234
							261	342
							279	249
							275	268
							274	240
							340	308
							252	240
							331	204
							232	238
							227	253
							261	250
							169	234
							210	216
							218	337
							211	428
							231	355
							187	288
							190	415
							162	388
							143	297
							155	137
							143	191
							115	168
								280
								184
								166
								131
								101
								129

## Sheet: Figure 5 Part-I
	Data for Figure-5C:						Data for Figure-Supplement-4D:							Data for Figure-5F:
	D-loop Lengths (nt)						Data were derived after merging individual replicates for each sample into one file.							D-loop Lengths (nt)
	1:1	1:3	1:6	1:12				Rad51: nt = 1: x						ds98-931				ds98-915-78ss
	119	183	221	214			Position of bin (bp)	1	3	6	12			0x	1x	3x	7x	0x	1x	3x	7x
	228	168	105	321			0	0	0	0	0			167	191	261	163	314	473	339	258
	166	214	227	503			100	0	0	0	0			241	282	199	373	415	646	313	224
	333	213	206	260			200	0.00622407	0	0.000576369	0			202	275	385	359	202	312	240	264
	463	222	314	425			300	0.00622407	0	0.000576369	0.000618812			424	321	229	156	181	292	474	348
	242	315	409	639			400	0.00207469	0	0.000576369	0.000618812			330	420	270	326	426	400	359	233
	208	632	330	283			500	0	0	0	0.000618812			360	279	238	249	281	382	257	308
	217	237	406	275		Homologous region (931 nt)	600	0	0	0	0.00185644			584	535	230	259	339	428	482	157
	244	282	226	225			700	0.0103734	0.00645161	0.00518732	0.00433168			473	327	291	346	368	519	622	285
	296	268	273	288			800	0.0477178	0.0365591	0.0420749	0.0464109			511	326	211	314	215	247	691	218
	196	214	285	268			900	0.0643154	0.0655914	0.0760807	0.0785891			117	340	239	242	238	224	202	307
	257	190	185	180			1000	0.0871369	0.0978495	0.112392	0.112624			328	229	210	540	306	265	366	229
	272	258	287	311			1100	0.0829876	0.115054	0.131412	0.133045			202	293	198	562	270	220	279	298
	228	289	218	306			1200	0.0995851	0.127957	0.134294	0.13552			309	305	265	278	293	223	215	290
	265	208	234	162			1300	0.0975104	0.132258	0.129683	0.131807			270	191	283	268	390	291	685	265
	366	151	236	210			1400	0.118257	0.126882	0.121614	0.126238			264	230	276	286	351	310	726	400
	379	326	232	247			1500	0.112033	0.110753	0.0951009	0.0915842			218	290	168	320	475	259	234	210
	456	318	338	261			1600	0.0912863	0.088172	0.0731988	0.0693069			242	253	199	242	438	263	271	268
	261	295	262	191			1700	0.0767635	0.0688172	0.0570605	0.0488861			133	234	262	289	394	390	389	227
	337	225	325	270			1800	0.00829876	0.00430108	0.00518732	0.00866337			323	162	197	306	773	451	538	190
	547	234	291	244			1900	0.0290456	0.00537634	0.00288184	0.00247525			266	175	352	275	886	161	560	502
	515	262	237	222			2000	0.0311203	0.00645161	0.00403458	0.00371287			294	218	215	315	384	171	577	345
	449	431	165	257			2100	0.0207469	0.00537634	0.00345821	0.00309406			311	265	234	218	449	232	172	225
	279	264	244	257			2200	0.00622407	0.00215054	0.00172911	0			248	165	285	238	394	192	262	305
	548	372	280	295			2300	0.00207469	0	0.00115274	0			247	278	235	283	457	272	374	276
	487	495	217	221			2400	0	0	0.000576369	0			337	247	132	217	521	239	204	222
	792	259	231	295			2500	0	0	0.000576369	0			303	226	286	127	545	199	367	357
	772	339	274	198			2600	0	0	0.000576369	0			172	307	213	391	707	181	243	152
	710	296	358	216			2700	0	0	0	0			211	565	197	246	815	143	260	229
	658	370	234	230										221	355	190	363	863	236	205	132
	740	438	215	304										260	332	467	224	781	347	493	239
	730	368	218	223										260	434	372	292	210	197	228	163
	892	481	184	324										219	343	332	272	308	201	288	290
	899	364	315	245										303	379	419	347	280	162	165	253
	641	335	205	161										210	237	349	129	244	196	178	357
	833	309	191	196										293	264	468	142	251	352	345	337
	257	321	227	302										222	337	331	241	229	269	253	376
	254	339	194	429										262	324	322	244	212	313	124	216
	194	420	371	301										272	487	234	198	368	251	227	149
	380	433	472	394										176	434	359	237	379	177	315	904
	353	441	258	502										233	439	252	162	297	221	150	190
	382	586	360	481										280	281	340	210	394	337	374	372
	435	485	399	349										277	258	220	113	382	248	343	154
	346	534	462	472										265	409	452	141	317	242	102	213
	185	540	382	407										233	324	186	358	522	178	207	218
	497	607	364	327										282	364	194	328	370	200	288	381
	473	232	368	340										385	391	207	228	271	253	302	260
	317	124	430	446										277	308	193	423	339	242	251	315
	313	279	437	360										302	393	382	416	558	310	426	258
	529	281	350	456										239	440	343	186	551	202	100	262
	655	278	384	279										326	375	548	216	604	214	381	158
	744	290	241	365										246	392	407	231	536	303	116	241
	558	207	278	261										299	319	602	265	509	232	315	371
	270	242	332	418										222	495	536	232	533	194	141	299
	556	198	372	263										261	209	558	484	559	175	295	247
	458	290	298	272										217	365	852	118	795	297	290	206
	518	329	393	231										296	206	534	317	567	206	371	237
	456	124	260	438										247	294	731	619	187	348	319	500
	272	941	407	438										337	212	701	169	419	136	249	484
	319	691	265	378										469	271	618	244	261	205	169	477
	368	718	280	230										243	231	363	288	192	190	222	368
	257	641	362	418										298	243	298	186	267	212	395	269
	336	769	309	434										262	262	357	281	277	221	214	214
	411	737	344	374										301	599	301	147	355	242	357	295
	350	879	328	483										526	508	239		371	351	357
	471	888	477	585										448	565	275		336	226	148
	483	787	382	553										392	599	274		317	184	322
	400	861	380	142										440	715	310		369	267	462
	369	740	510	215										370	720	318		263	127	294
	364	758	322	218										345	909	321		504	178	195
	418	876	455	199										305	857	240		415	155	526
	368	846	328	206										298	840	324		293	498	474
	598	680	400	251										432	796	367		468	572	250
	180	738	360	245										488	747	317		164	530	299
	276	781	581	242										289	720	402		366	535	207
	392	910	468	207										327	759	419		278	620	176
	370	849	615	680										257	789	265		288	417	528
	308	260	473	737										245	823	371		519	368	120
	334	411	594	627										334	748	271		208	356	309
	267	331	528	662										231	809	362		205	214	424
	274	403	474	675										290	761	273		383	272	448
	282	461	584	588										261	823	324		547	484	112
	264	377	506	678										277	187	336		353	345	174
	332	373	427	635										421	273	325		379	313	251
	265	278	426	614										439	314	318		330	421	220
	221	320	584	697										277	284	354		370	255	123
	187	382	446	651										406	411	299		315	202	220
	280	303	560	705										307	253	354		616	332	324
	191	233	558	558										270	384	398		263	382	254
	147	130	525	644										264	258	357		660	408	271
	144	231	415	607										484	273	326		138	830	347
	140	190	613	727										272	309	226		289	735	303
	178	220	417	558										346	319	196		314	840	396
	237	236	550	811										335	404	188		227	841	217
	188	448	257	603										366	231	277		136	873	546
	311	408	146	784										124	375	463		616	900	366
	231	440	290	838										193	363	453		503	859	489
	217	509	267	911										253	283	467		369	876	737
	152	364	266	879										238	365	459		301	701	293
	232	534	260	759										236	331	413		534	562	219
	195	343	251	867										183	299	520		279	661	289
	553	401	243	757										831	371	502		247	596	214
	414	401	189	799										937	233	565		458	606	313
	205	722	281	892										904	120	672		703	512	273
	521	669	368	885										577	271	537		298	664	250
	198	440	273	808										650	230	696		276	606	382
	766	682	270	845										683	190	614		219	710	464
	948	496	321	750										740	410	629		224	673	371
	481	590	267	733										643	518	388		290	754	401
	679	679	277	846										579	427	291		183	668	261
	226	538	262	762										765	563	228		277	674	262
	392	538	242	638										837	431	287		235	790	175
	652	633	353	847										782	657	295		366	658	249
	159	724	259	816										762	520	382		374	656	270
	334	689	303	784										781	528	375		409	815	210
	589	735	239	675										853	634	346		171	784	337
	275	656	316	624										917	331	303		633	657	293
	409	790	254	714										860	365	337		477	520	468
	370	274	239	918										868	352	238		196	503	242
	117	355	247	954										690	250	466		322	509	197
	510	319	265	523										651	191	394		355	583	287
	252	351	252	542										665	299	353		521	604	271
	266	296	247	673										697	450	361		499	582	156
	205	338	142	684										747	257	439		487	547	463
	326	281	241	585										710	450	299		771	603	238
	380	279	370	565										692	322	288		128	544	349
	278	282	310	519										759	368	326		217	599	239
	257	490	380	624										786	396	322		485	753	533
	252	484	289	617										798	354	323		493	678	214
	241	521	286	580										707	427	226		177	679	569
	829	355	369	508										874	240	235		405	499	383
	336	403	317	634										931	265	320		430	443	327
	273	523	309	656										748	319	325		457	378	198
	245	438	258	760										785	379	314		233	296	133
	153	469	252	373										634	354	282		141	359
	305	406	258	435										768	268	275		383	259
	437	348	375	438										930	424	331		390	402
	234	477	308	501										965	238	259		338	308
	319	478	341	455										936	380	231		654	461
	629	475	352	495										219	247	177		367	452
	158	527	252	518										448	274	219		156	325
	134	289	376	498										515	323	184		500	401
	253	319	301	549										490	269	251		613	434
	409	346	268	538										550	325	210		216	381
	448	265	355	515										565	208	209		229	387
	221	238	364	476										657	298	205		423	490
	395	249	422	511										602	277	283		666	490
	546	349	355	504										705	315	237		607	443
	206	484	392	508										587	210	220		147	520
	211	613	334	513										717	410	195		321	213
	278	333	284	242										548	219	165		175	280
	360	281	392	331										620	154	318		311	253
	139	259	409	282										629	194	496		457	306
	432	303	305	338										589	228	487		331	247
	218	314	394	269										736	228	394		635	184
	370	312	374	308										560	208	153		175	241
	226	327	310	341										624	225	452		283	217
	262	322	396	229										588	274	244		336	159
	222	273	278	319										575	164	235		214	136
	313	261	239	282										534	209	238		475	266
	617	279	301	310										601	226	174		287	226
	274	275	244	293										578	234	482		576	206
	271	274	201	312										588	265	310		395	234
	562	340	264	319										667	199	257		554	234
	156	252	210	322										607	183	227		318	131
	195	331	176	234										624	669	337		142	210
	475	232	426	363										645	249	272		245	257
	250	227	387	268										640	226	563		303	262
		261	409	343										560	291	647		545	268
		169	322	270										649	190	395		399	192
		210	288	316										790	292	271		305	213
		218	330	246										800	265	390		282	208
		211	311	270										675	687	422		354	247
		231	288	267										462	296	374		265	278
		187	252	233										367	266	232		257	183
		190	907	389										375	161	391		463	290
		162	1003	346										379	311	225		250	279
		143	541	262										500	198	212		328	235
		155	692	375										400	513	390		233	306
		143	633	270										418	244	230		351	191
		115	678	375										343	462	669		704	391
		322	658	386										332	458	347		456	428
		729	644	306										498	147	382		358	314
		708	577	322										395	268	367		378	411
		229	619	359										443	252	275		254	438
		309	652	374										471	327	281		221	340
		212	654	242										344	352	640		276	337
		284	892	374										368	772	259		204	355
		302	908	352										477	444	304		283	398
		272	715	360										457	270	237		184	480
		434	752	315										355	606	309		312	395
		142	809	349										451	226	275		386	324
		314	887	431										377	278	629		334	207
		432	763	338										440	303	235		259	271
		280	790	411										528	252	516		386	459
		197	741	333										474	270	886		334	295
		316	799	305										527	267	324		224	409
		246	809	354										478	233	398		266	293
		833	867	233										599	266	268		633	305
		299	743	241										441	421	252		237	413
		268	751	242										615	372	146		389	263
		279	808	280										648	275	375		238	437
		256	855	333										508	284	720		314	364
		271	823	295										559	441	216		631	270
		253	737	343										479	725	250		333	278
		275	670	317										549	251	432		474	394
		728	864	294										554	340	266		353	297
		1030	528	288										520	541	338		236	306
		730	521	395										574	208	250		171	173
		525	475	375										578	487	340		213	310
		263	467	122										424	520	546		320	465
		557	533	281										635	286	234		332	427
		296	493	224										581	281	500		432	380
		187	467	485										599	782	306		281	441
		404	399	368										600	236	234		237	414
		509	533	366										509	399	130		378	474
		858	570	366										468	141	546		807	458
		278	674	399										567	413	216		453	441
		236	686	423										580	850	356		538	497
		321	542	425										417	335	369		336	492
		266	664	344										509	524	314		831	522
		501	478	466										603	755	388		325	608
		434	565	444										548	311	274		994	269
		707	589	512										483	660	141		153	258
		334	671	460										487	307	606		318	357
		405	513	497										601	210	851		231	283
		218	709	270										441	211	588		251	172
		668	577	318										492	180	238		594	255
		772	656	280										516	255	267		521	329
		359	721	237										556	106	346		212	203
		277	551	296										556	206	681		324	267
		226	519	284										462	193	468		274	177
		179	703	408										556	279	214		276	367
		141	717	616										650	185	262		136	314
		318	554	550										616	582	299		328	247
		419	671	520										682	515	480		190	275
		338	602	267										515	668	431		135	292
		901	541	330										678	278	399		178	256
		253	605	309										251	397	499		486	306
		280	662	269										262	411	143		387	193
		332	798	334										193	210	268		387	205
		321	742	304										199	204	418		312	403
		470	244	528										246	311	323		219	425
		190	287	351										282	207	181		271	338
		441	345	266										224	357	709		522	354
		495	344	262										186	652	248		236	239
		478	231	553										317	230	193		268	319
		624	270	473										248	176	427		387	354
		249	337	522										342	400	117		365	314
		289	324	250										310	145	145		446	376
		879	272	347										314	476	277		106	358
		403	487	256										299	181	189		257	349
		301	364	318										296	207	177		410	360
		483	306	400										388	301	278		292	236
		394	287	451										324	170	281		403	390
		528	401	487										340	226	338		439	231
		264	272	468										220	180	287		276	322
		363	528	387										218	473	384		337	383
		234	281	413										263	276	115		285	301
		264	387	487										305	346	157			265
		310	350	346										231	223	320			349
		409	344	342										239	164	541			237
		298	562	377										377	284	271			406
		169	256	239										320	311	214			362
		400	387	244										426	264	204			251
		406	327	374										306	382	252			212
		442	447	317										360	234	212			238
		234	349	342										368	244	589			213
		345	509	424										406	226	274			263
		551	279	475										352	241	218			236
		125	371	348										344	469	324			208
		546	543	462										371	418	188			220
		568	347	381										353	269	390			229
		178	318	518										265	168	470			352
		224	361	579										295	561	227			449
		278	433	492										473	113	324			481
		229	410	273										290	365	499			493
		779	405	259										354	345	227			254
		434	410	321										380	873	354			348
		135	278	229										281	366	392			271
		901	547	318										316	244	362			128
		501	362	314										407	535	483			422
		694	327	209										352	262	174			753
		334	347	214										423	383	438			230
		901	534	267										255	139	242			638
		715	587	310										254	305	308			197
		332	312	287										403	355	365			267
		421	265	223										461	474	272			414
		291	310	315										372	439	467			440
		242	370	235										276	316	468			500
		202	289	268										374	301	215			535
		354	261	275										362	442	266			330
		351	275	235										369	424	188			610
		255	363	332										360	257	254			419
		832	164	324										263	139	259			660
		390	264	308										130	243	271			701
		284	247	332										226	212	662			305
		515	270	252										256	647	521			468
		391	289	305										251	190	405			529
		794	242	407										256	306	237			755
		910	268	453										257	279	257			236
		340	319	390										263	176	209			442
		339	269	244										203	449	249			205
		460	292	170										400	436	241			612
		294	315	285										320	281	579			458
		635	327	178										512	430	252			260
		200	382	232										405	315	208			636
		204	248	253										450	497	277			356
		541	242	250										480	254	112			283
		407	232	290										387	293	376			213
		237	208	239										256	256	507			524
		414	329	135										608	263	359			546
		385	249	225										384	460	195			129
		411	382	265										251	310	252			195
		773	142	505										314	348	254			206
		296	134	583										334	208	135			351
		275	255	481										371	450	892			238
		814	211	898										272	240	362			181
		278	214	190										234	364	263			262
		235	225	319										274	483	275			343
		594	234	414										387	583	367			709
		338	227	331										359	244	297			252
		357	187	399										350	184	458			256
		467	218	204										278	290				422
		238	289	567										438	408				296
		312	274	270										322	430				673
		305	217	254										352	344				458
		326	303	223										322	382				267
		606	265	204										460	392				375
		310	279	388										257	550				156
		777	331	239										314	418				291
		598	280	475										367	256				349
		358	149	594										477	264				264
		293	203	486										364	217				295
		397	267	487										337	321				488
		230	421	232										374	230				412
		264	405	745										281	496				581
		288	878	505										306	199				283
		253	761	313										480	206				217
		481	324	141										472	226				211
		265	346	195										480	544				387
		265	550	943										388	250				370
		229	266	569										287	374				179
		231	426	278										467	234				346
		457	186	728										350	289				364
		147	192	251										281	200				276
		274	322	324										311	404				204
		544	374	883										451	266				375
		223	189	468										253	354				459
			158	322										542	384				359
			753	1060										235	202				333
			607	271										319	407				440
			204	433										320	435				337
			190	295										226	238				260
			792	323										269	325				211
			295	789										265	228				333
			271	613										316	147				360
			308	215										263	232				226
			834	244										257	410				236
			225	265										270	230				263
			203	286										320	562				159
			259	548										268	397				306
			221	406										284	831				633
			451	538										303	305				434
			263	494										273	704				430
			197	519										314	240				129
			211	213										333	284				249
			858	501										259	248				217
			892	189										211	655				232
			199	424										283	187				258
			331	300										318	369				504
			578	747										283	215				445
			333	260										307	256				518
			758	473										218	349				207
			238	589										157	338				381
			283	251										187	237				386
			446	319										214	150				323
			692	436										201	430				480
			206	495										214	283				266
			309	782										208	264				309
			453	228										187	343				313
			688	634										184	379				429
			422	267										144	229				342
			329	892										143	503				224
			236	273										142	174				221
			252	586										185	226				205
			266	456										155	726				320
			371	256										204	415				274
			563	376										165	257				492
			232	369										265	174				230
			472	289										389	480				364
			316	403										468					344
			460	292										370					255
			394	901										369					426
			214	274										225					289
			364	153										313					577
			386	467										452					487
			373	314										512					256
			265	271										679					300
			379	217										838					389
			252	1034										457					715
			656	272										581					684
			822	674										504					331
			461	424										783					188
			434	588										262					220
			271	271										511					290
			602	226										208					155
			402	459										294					144
			129	164										328					183
			293	186										281					378
			818	958										433					225
			311	177										297					484
			655	336										192					239
			193	904										418					390
			191	593										720					262
			178	326										301					138
			301	258										422					226
			355	487										217					382
			815	880										577					283
			254	432										434
			502	236										777
			272	285										123
			349	432										301
			253	594										343
			381	303										216
			374	520										128
			373	833										755
			600	254										438
			547	601										350
			214	399										295
			364	289										478
			105	469										224
			844	819										117
			399	370										409
			879	179										203
			220	362										468
			284	646										403
			596	185										374
			233	220										357
			155	294										349
			200	344										352
			378	340										252
			325	473										285
			391	300										439
			261	451										383
			161	374										850
			724	869										398
			271	511										339
			321	328										355
			200	382										800
			217	227										346
			908	366										513
			179	582										504
			231	542										711
			329	276										626
			317	525										312
			252	545										364
			487	423										732
			238	413										590
			351	536										731
			318	383										624
			269	334										359
			274	389										347
			433	485										369
			587	333										107
			347	518										151
			414	395										322
			546	508										365
			378	217										174
			390	445										134
			460	487										245
			408	484										318
			278	490										227
			234	547										318
			457	570										384
			360	678										347
			661	414										227
			434	381										495
			227	474										429
			391	322										244
			394	282										163
			446	197										167
			498	382										357
			507	554										346
			306	209										213
			830	313										382
			255	218										249
			214	505										413
			266	278										254
			504	318										476
			340	309										237
			143	284										604
			659	255										246
			372	428										788
			216	270										332
			252	483										239
			282	251										298
			192	347										354
			312	216										248
			274	378										332
			495	346										282
			262	778										445
			361	423										446
			430	273										219
			476	431										434
			655	169										410
			669	328										610
			506	222										426
			622	205										347
			246	613										907
			328	279										405
			512	328										214
			525	246										295
			308	124										288
			394	382										489
			720	282										232
			516	358										289
			313	657										231
			610	204										297
			418	821										459
			374	511										241
			977	230										232
			296	283										323
			292	276										310
			211	264										434
			277	318										282
			216	536										379
			384	800										242
			549	485										243
			520	211										724
			199	339										234
			436	214										232
			241	299										272
			295	296										307
			266	338										375
			270	391										270
			344	535										293
			469	281										378
			386	275										222
			160	349										265
			226	241										487
			249	586										449
			577	759										407
			337	276										229
			247	322										456
			383	234										257
			289	176										246
			365	284										477
			241	192										429
			654											360
			390											321
			291											175
			451											339
			906											238
			372											538
			346											263
			490											287
			391											261
			260											279
														259
														611
														245
														302
														250
														430
														448
														253
														318
														737
														340
														416
														488
														337
														217
														696
														390
														420
														256
														387
														226
														228
														266
														138
														205
														322
														237
														272
														253
														166
														437
														489
														350
														243
														332
														274
														139
														360
														686
														270
														275
														266
														296
														337
														131
														616
														219
														527
														233
														524
														785
														688
														406
														331
														337
														374
														427
														709
														753

## Sheet: Figure 5 Part-II
	Data for Figure-5B:
	Rad51: nt = 1:x	1	3	6	12	24	48
		9.44016	15.7673	16.7682	21.6947		11
		11.6737	22.2625	23.4222	22.731	4.76049	1.69474
		14.1771	40.8886	36.6219	38.7806	28.8422	22.551
	Data for Figure-Supplement-4C:
	Rad51: nt = 1:x	1	3	6	12
		11.1111	15.4772	15.7745	21.8271
		10.2249	33.119	41.2639	34.0425
		15.4545	27.2152	35.3383	33.0855
	Data for Figure-Supplement-5B:
	ds98-931				ds98-915-78ss
	0x	1x	3x	7x	0x	1x	3x	7x
	100	68.7964	38.478	0.930488	100	96.6669	78.7188	0.548982
	100	85.2479	72.442	17.3169	100	105.779	40.3222	24.4256
	100	85.8255	66.8971	12.6131	100	85.9216	78.005	39.0414
	Data for Figure-Supplement-5E:
	ds98-931								ds98-915-78ss
	Gel				Reads				Gel				Reads
	0x	1x	3x	7x	0x	1x	3x	7x	0x	1x	3x	7x	0x	1x	3x	7x
	41.7541	39.3337	36.1796	21.6438	15.87	10.8	11.6	2.18	54.7815	55.2302	52.3062	22.5037	8.62	7.11	4.24	1.33
	34.8416	37.2739	27.0881	9.865	37.27	24.59	17	2.69	28.4098	30.0516	11.4554	6.93926	31	27.63	3.97	1.42
	41.1961	35.3567	27.559	5.19609	20	15	7	1	22.7533	19.55	17.7487	8.8832	37	16	5	1.2
	25.111	23.7211	19.3155		9	9	10	1	53.6619	51.5994	32.7816	5.72959	12	8	10	4.1
	Data for Figure-5E:
	[Tid1-KR]/[Rad54]	0-249					250-499					500-749					750-930
	0x	14.7757	11.4286	21.4286	21.2	13.4	56.4644	67.1429	51.1905	57.5	69	22.1636	21.875	25	15		5.80475	8.57143	2.38095	6
	1x	25.4658	13.5417	22.2222	30.5	20	57.764	62.5	58.5859	52.7	70	10.559	12.8571	15.1515	11		6.21118	2.08333	4.0404	5
	3x	29.0541	16.1017	27.7778	14.2	32	59.4595	66.9492	69.4444	71.4	57	10.8108	13.5593	2.77778	9		0.675676	3.38983	0	3
	7x	32	57.1429		0	33	60	42.8571		100	44	8	0		0		0	0		0
	Data for Figure-Supplement-5F:
	[Tid1-KR]/[Rad54]	0-249				250-499				500-749				750-915
	0x	14.4927	17.8571	13	16	57.971	59.2857	63	68	18.8406	20.7143	20	25	8.69565	6.14286	7	5
	1x	29.8182	23.0769	31	16	52	56.4103	51	51	13.0909	17.9487	17	10	4.72727	2.5641	2	0
	3x	26.6667	26.1905	31	20	50	73.8095	58	65	9.33333	0	13	8	0	0	1	0
	7x	40	23.3333	30	40	55	66.6667	60	60	5	6.66667	3	0	0	3.33333	0	0
	Data for Figure-5G:
	ds98-931				ds98-915-78ss
	0x	1x	3x	7x	0x	1x	3x	7x
	33	31	23	19	28	27	2	14
	35	19	16	7	29	22	13	5
	33	21	7	0	25	20	16	10
	35	22	13	8	33	20	17	0

## Sheet: Figure 5 Part III
	Data for Figure-Supplement-5J:							Data for Figure-Supplement-5I:
		Fraction of D-loops in each bin							Fraction of D-loops in each bin
		ds98-931							ds98-915-78ss
		[Tid1-KR]/[Rad54]							[Tid1-KR]/[Rad54]
	Position of bin (bp)	0x	1x	3x	7x			Position of bin (bp)	0x	1x	3x	7x
	0	0	0	0	0			0	0	0	0	0
	100	0	0	0	0			100	0	0	0	0
	200	0.00082203	0.000822368	0.000864304	0			200	0	0.00122624	0	0
	300	0.00123305	0.000822368	0.000864304	0		Homologous region (915 nt)	300	0	0.00122624	0	0.00448431
	400	0.00082203	0.000822368	0.000864304	0			400	0.0021164	0.00613121	0	0.00896861
	500	0.000411015	0	0.000864304	0			500	0.0222222	0.0226855	0.0110375	0.0134529
Homologous region (931 nt)	600	0.000411015	0.000822368	0	0			600	0.0571429	0.0619252	0.0441501	0.0403587
	700	0.00698726	0.00657895	0.00605013	0.00440529			700	0.100529	0.0987124	0.0772627	0.0717489
	800	0.0513769	0.0542763	0.0518583	0.0484581			800	0.125926	0.124464	0.119205	0.103139
	900	0.0998767	0.0879934	0.0847018	0.0660793			900	0.13545	0.138565	0.143488	0.139014
	1000	0.131525	0.117599	0.116681	0.092511			1000	0.13545	0.136726	0.156733	0.143498
	1100	0.140567	0.128289	0.126188	0.0837004			1100	0.132275	0.1355	0.15894	0.139014
	1200	0.135635	0.120066	0.121003	0.0837004			1200	0.102646	0.111588	0.12362	0.116592
	1300	0.12536	0.121711	0.120138	0.0881057			1300	0.0772487	0.0901288	0.0728477	0.0852018
	1400	0.111796	0.112664	0.115817	0.105727			1400	0.0518518	0.0582465	0.0485651	0.0627803
	1500	0.0776819	0.0962171	0.0907519	0.118943			1500	0.0137566	0.00674433	0.00883002	0.0134529
	1600	0.0571311	0.078125	0.0734659	0.092511			1600	0.0010582	0	0.00220751	0
	1700	0.0398685	0.0493421	0.0535869	0.0881057			1700	0.0021164	0	0	0.00448431
	1800	0.00452117	0.00246711	0.00864304	0.0132159			1800	0.0021164	0.000613121	0.00220751	0.00896861
	1900	0.00411015	0.00575658	0.00605013	0.0176211			1900	0.00740741	0.00122624	0.00662252	0.0179372
	2000	0.00411015	0.00740132	0.0103717	0.0440529			2000	0.0148148	0.00183936	0.013245	0.0134529
	2100	0.00369914	0.00657895	0.00950735	0.0396476			2100	0.0116402	0.00183936	0.00883002	0.00896861
	2200	0.00123305	0.00164474	0.00172861	0.0132159			2200	0.0042328	0.000613121	0.00220751	0.00448431
	2300	0.000411015	0	0	0			2300	0	0	0	0
	2400	0.000411015	0	0	0			2400	0	0	0	0
	2500	0	0	0	0			2500	0	0	0	0
	2600	0	0	0	0			2600	0	0	0	0
	2700	0	0	0	0			2700	0	0	0	0
	Data were derived after merging individual replicates for each sample into one file.							Data were derived after merging individual replicates for each sample into one file.

## Sheet: Figure Supplement 6
	Data for Figure-Supplement-6B:
		0-249			250-499			500-749			750-930
	0x	22	26.6667	23.8366	62	56.6667	60.7843	13	14.6667	11.7647	3	2	2.96078
	1x	27.4678	36.1842		66.5236	54.1053		5.5794	9.21053		0.429185	0.5
	3x	35.8974	31.25		61.5385	64.5833		2.5641	4.16667		0	0
	7x	38.7097	43.9024		54.8387	53.6585		6.45161	2.43902		0	0
	14x	44.1861	72.7273		55.8139	27.2727		0	0		0	0
	Data for Figure-Supplement-6C:
	ds98-931
	0x	1x	3x	7x	14x
	314.167	309.73	291.958	288.561	226.636
	350.36	312.06	313.641	284.935	274.023
	351.98				214.23
	Data for Figure-Supplement-6D:
	ds98-931
	0x	1x	3x	7x	14x
	6.87329	3.21	1.45	1.30604	1.08
	5.86956	4.2	1.77	1.59272	1.19277

## Sheet: Figure-6
	Data for Figure-6B:
		2216 bp homology
	Time post DSB (hr)	WT			tid1∆
	0	0.165098	0.01	0.019231	0.231678	0.15	0.0878
	0.5	1.07562	0.031357	2.51305	2.09596	3.12	3.543
	1	9.19413	1.80602	11.0722	16.905	30.354	60.0832
	2	27.3671	60.1618	26.594	34.7122	79.32	85.4051
	5	78.7743	82.7907	78.2129	108.369	100.12	106.466
	Data for Figure-6C:
		148 bp homology
	Time post DSB (hr)	WT			tid1∆
	0	0.602	0.208		0.238	0.266
	1	0.742	0.528		0.368	0.557
	2	4.26	4.81		3	4.65
	3	18	10.8	14.2	12.4	8.93	10.5
	5	32.7	23.5	32.1	29.1	19.6	28.8
	Data for Figure-6D:
		Percentage of cells on YP-Gal plate/YP-Glu plate
		148 bp homology		2216 bp homology
		WT	tid1∆	WT	tid1∆
		101.786	69.7479	103.03	92.5926
		100	61.7391	110.569	77.686
		75.7576	93.6709	122.641	96.8085
		72	120.69	71.5909	89.2157
		63.6364	86.1539	111.111	74.4444
		67.2414	70.8333	117.188	69.4915
		101.37	72.3077	72.8261	65.4135
		69.6629	79.5181
